# Supplementary material for: Histone deacetylase inhibitors downregulate CCR4 expression and decrease mogamulizumab efficacy in CCR4-positive mature T-cell lymphomas
Source: PubMed Central journal article supplement — Haematologica. 2017 Oct 12;103(1):126–35. doi: 10.3324/haematol.2017.177279 (PMC5777200; doi:10.3324/haematol.2017.177279), 2018-01
Supplement: 2017_177279-Disclosures_and_Contributions.pdf [file 2017_177279-Disclosures_and_Contributions.pdf]

Haematologica  
HAEMATOL/2017/177279  
Version 3

Histone deacetylase inhibitors downregulate CCR4 expression and decrease mogamulizumab efficacy in CCR4-positive mature T-cell lymphomas

Akihiro Kitadate, Sho Ikeda, Fumito Abe, Naoto Takahashi, Norio Shimizu, Kosei Matsue, and Hiroyuki Tagawa

Disclosures: The authors declare no competing financial interests.

Contributions: AK, SI, FA, NT, NS, KM, and HT performed experiments and/or analyzed data. AK and HT designed experiments and wrote the paper.
